# Supplementary material for: Prognostic factors in elderly patients with breast cancer
Source: PubMed Central journal article supplement (PMC3851261; doi:10.1186/1471-2482-13-s2-s2), 2013-10-08
Supplement: 1471-2482-13-S2-S2-S1.pdf [file 1471-2482-13-S2-S2-S1.pdf]

**Additional file 1. Principal studies correlating older ages and prognostic factors.**

| <b>Authors</b> | <b>Year</b> | <b>N</b> | <b>Age</b>       | <b>follow up</b> | <b>Aim of the study</b>                                   | <b>Relevant prognostic factors identified and/or conclusions</b> |
|----------------|-------------|----------|------------------|------------------|-----------------------------------------------------------|------------------------------------------------------------------|
| Ali et al,     | 2011        | 14048    | >50<br>(40% >70) | 5 and 10 yrs     | Survival in different age groups                          | Age >75, lack of screening, deprivation predict poorer survival. |
| Barthelemy     | 2011        | 192      | 76,7<br>(70-98)  |                  | Impact of age and CGA on prescription of therapy.         | Older age is a risk factor of under-treatment                    |
| Botteri        | 2010        | 12152    | 52               |                  | Relationship between lymph node (LN) involvement and age. | Delayed diagnosis is predictive of LN*.                          |
| Bouchardy      | 2003        | 407      | >80              | 5 yrs            | Determinants and effect of treatment choice.              | Pf: age, under-treatment.                                        |
| Chagpar        | 2009        | 4131     | 60<br>(27-100)   |                  | Adequacy of AND                                           | Increasing age correlates with less adequate AND (<10 LN).       |

|             |      |       |             |          |                                                                        |                                                                                                                                                                                                           |
|-------------|------|-------|-------------|----------|------------------------------------------------------------------------|-----------------------------------------------------------------------------------------------------------------------------------------------------------------------------------------------------------|
| Chagpar     | 2007 | 700   | 76<br>(>70) |          | Develop a clinical rule to predict node positivity.                    | T, G, LVI are predictive of node positivity.                                                                                                                                                              |
| Clough-Gorr | 2010 | 660   | >65         | 5-10 yrs | Survival for Cancer specific CGA in early BC.                          | ≥3 cancer specific CGA predict poor prognosis.                                                                                                                                                            |
| Ejlertsen   | 2009 | 15659 | All ages    | 7,7      | Significant of LVI                                                     | LVI isn't an independent risk factor.                                                                                                                                                                     |
| Gajdos      | 2001 | 206   | >70         |          | Comparing treatment and outcome with younger                           | Although under-treatment was more frequent in older people, it doesn't affect chance of survival or risk of recurrence.                                                                                   |
| Gennari     | 2004 | 2999  | >50         |          | Evaluating relationship between biologic features and treatment choice | Older women have more favorable biological characteristics. Treatment should be chosen on the basis of biologic characteristics, comorbidity, social support, functional status, and patient preferences. |
| Hartmann    | 2011 | 4056  | All ages    | 5 yrs    | Diabetes as prognostic factor                                          | Diabetes doubles risk for distant metastases in ER-;<br>diabetes doubles mortality on 5 yrs follow up.                                                                                                    |

|          |      |       |                |         |                                                                                                                                       |                                                                                                                                                                                                                        |
|----------|------|-------|----------------|---------|---------------------------------------------------------------------------------------------------------------------------------------|------------------------------------------------------------------------------------------------------------------------------------------------------------------------------------------------------------------------|
| Hieken   | 2004 | 104   | >65            |         | Utility of SNB in elderly                                                                                                             | 28% of elderly had $\geq 1$ N+.                                                                                                                                                                                        |
| Livi     | 2006 | 1500  | >65<br>(65-87) | 8,7 yrs | Evaluating prognostic factors in elderly                                                                                              | For cancer-specific survival (CSS): local relapse, PN status, the type of surgery, radiotherapy, chemotherapy. For local disease-free survival (LDFS): mastectomy, histotype, PN status, and pt status.                |
| Lyman    | 2003 | 20799 | All ages       |         | Evaluating risk of under treatment                                                                                                    | Older ages.                                                                                                                                                                                                            |
| Martelli | 2005 | 219   | 65-80          | 5 yr    | Randomized trial; survival and axillary relapse in pts undergone to CBS + TMX vs. BCS + AS + TMX                                      | Axillary dissection may be safely omitted in older patients with early stage breast cancer and no palpable axillary nodes since its omission has no discernible effect on breast cancer mortality or overall survival. |
| Martelli | 2011 | 671   | $\geq 70$      | 15      | Retrospective analysis comparing elderly patients with early breast cancer who received conservative surgery with or without axillary | Axillary dissection can be omitted. A negative status is associated with significantly greater rates of distant metastases and breast cancer death                                                                     |

|             |      |           |          |         |                                                           |                                                                                                                                                                                                                                                                                           |
|-------------|------|-----------|----------|---------|-----------------------------------------------------------|-------------------------------------------------------------------------------------------------------------------------------------------------------------------------------------------------------------------------------------------------------------------------------------------|
|             |      |           |          |         | dissection.                                               |                                                                                                                                                                                                                                                                                           |
| Melicharovà | 2010 |           |          |         | Test urinary neopterin as marker of comorbidity.          | Significantly higher neopterin levels were noted in >70 yrs patients or with two or more comorbid conditions.                                                                                                                                                                             |
| Mittendorf  | 2012 | 509 + 464 |          |         | Incorporation of metastasis size in SN in a nomogram.     | Size of node metastasis is useful to predict no SN metastasis.                                                                                                                                                                                                                            |
| Moghaddam   | 2010 | 108       |          |         | Comparison of nomograms.                                  | Similar results.                                                                                                                                                                                                                                                                          |
| Muss        | 2005 | 6487      | All ages | 9.6 yrs | Usefulness of chemotherapy in older vs. younger patients. | Predictive factors of better survival are smaller t, fewer N+, higher doses CHT and TMX : more (0.5%) therapy related deaths.                                                                                                                                                             |
| Owusu       | 2008 | 961       |          |         | Factors predicting interruption in HT.                    | Predicting factors are age >75 v < 70 years; increase in Charlson Comorbidity Index at 3 years from diagnosis; increase in the number of cardiopulmonary comorbidities at 3 years; indeterminate ER status v ER-positive status; breast-conserving surgery (BCS) without radiotherapy vs. |

|             |      |       |     |       |                                                                                                         |                                                                                                                                                                                                                                                                                                                                                                                  |
|-------------|------|-------|-----|-------|---------------------------------------------------------------------------------------------------------|----------------------------------------------------------------------------------------------------------------------------------------------------------------------------------------------------------------------------------------------------------------------------------------------------------------------------------------------------------------------------------|
| Pal         | 2008 |       |     |       | Validation of nomograms.                                                                                | mastectomy.                                                                                                                                                                                                                                                                                                                                                                      |
| Patnaik     | 2011 | 64034 | ≥66 | 5 yrs |                                                                                                         | Comorbidities worsen survival outcomes like or more than later stage at diagnosis. Myocardial infarction, peripheral vascular disease, stroke, chronic obstructive pulmonary disease, and diabetes determine outcome as shifting the stage by one from I-II to II-III; dementia, chronic renal failure, and liver disease shift the outcome by two stages (from I-II to III-IV). |
| Phua        | 2010 | 137   | >70 | 5 yrs | Retrospective study: OS, CSS; prognostic factors.                                                       | Performance status, T3-4 tumor, M +, G and ER status were independent prognostic factors for OS. For CSS : T4 tumor, M+ and ER status.                                                                                                                                                                                                                                           |
| Poltinnikov | 2006 | 153   | ≥70 | 55mo  | Cause specific survival (CSS), (OS), and combined nodal and distant failure (NDF). Her-2 neu positivity | Her-2 neu + predicts development of NDF and lower CSS.                                                                                                                                                                                                                                                                                                                           |

|                       |      |       |          |                   |                                                                                                    |                                                                                                                                                                                                                                                      |
|-----------------------|------|-------|----------|-------------------|----------------------------------------------------------------------------------------------------|------------------------------------------------------------------------------------------------------------------------------------------------------------------------------------------------------------------------------------------------------|
| Quaglia               | 2011 | 1081  | All ages | 5 yrs             | Effect of age and socio-economic status (SES) on CSS                                               | ≥70 in lower SES had 58% CSS vs. 91% of younger and wealthier.                                                                                                                                                                                       |
| Ramjeesingh           | 2009 | 397   | All ages |                   | Prediction of metastases in sentinel node; validation of nomogram                                  | Multifocality and LVI predictive for SN +; MSKCC nomogram overrated the risk of NSN metastases.                                                                                                                                                      |
| Richards              | 1999 | 2022  | All ages |                   | Influence of delay in diagnosis on OS and CSS                                                      | Longer delays are associated with worse survival. At 10 years from onset of symptoms a difference in CSS was observed between patients with delays of less or more than 12 weeks (57% vs. 537%). At 20 years, the difference in CSS was 48% vs. 33%. |
| Satariano and Ragland | 1994 | 936   | All ages | 3 yrs             | Effect of comorbidity on survival                                                                  | 3 comorbidity determine a 4-fold higher all-causes mortality.                                                                                                                                                                                        |
| Schonberg             | 2010 | 49616 | ≥67      | 5,6<br>(2-13) yrs | Variations in breast cancer tumor characteristics, initial treatments received, and survival among | Age >80 increases risk to die from BC. Mastectomy, BCS alone, or no surgery are predictive of poorer prognosis respect to BCS+RT. Chemotherapy was associated with a                                                                                 |

|           |      |      |                                              |          |                                                                                                                                                                 |                                                                                                                                                                                                                                                                                                                                                                                                           |
|-----------|------|------|----------------------------------------------|----------|-----------------------------------------------------------------------------------------------------------------------------------------------------------------|-----------------------------------------------------------------------------------------------------------------------------------------------------------------------------------------------------------------------------------------------------------------------------------------------------------------------------------------------------------------------------------------------------------|
|           |      |      |                                              |          | women age 80 to 84, 85 to 89, and ≥90 years with early-stage (stage I or II) breast cancer compared with younger women (age 67 to 79 years).                    | significant reduction in mortality for women age 67 to 79 years (AHR, 0.6; range, 0.5 to 0.8) and an increased risk of mortality for women age ≥80 years (AHR, 1.5; range, 0.9 to 2.3) that did not achieve statistical significance.                                                                                                                                                                     |
| Schrauder | 2011 | 4056 | All age. 3027 post-menopausal, mean age 57,6 | 1-16 yrs | Influence of diabetes on survival, distant metastasis-free survival and local recurrence free survival in relation to common tumor and patient characteristics. | Patients with DM were significantly older (mean 67,4) at diagnosis of BC and presented with a higher tumor stage. Mortality following BC was significantly higher among women with DM compared to BC patients without DM (HR 1.90; 95% CI 1.49–2.48).                                                                                                                                                     |
| Silliman  | 2009 | 1859 | ≥65                                          | 10 yrs   | Linking variations in treatment and follow-up care to variations in outcomes.                                                                                   | ≥75 years of age, with more comorbidity, low or intermediate risk of recurrence are more frequently associated with non-standard primary therapy, particularly BCS without rt. BCS without RT was associated with : increased rate of recurrence, second primary breast cancer and breast cancer mortality. Among hr + tumors group, less than one year of tamoxifen was associated with a higher rate of |

|               |      |           |         |         |                                                                                                                                     |                                                                                                                                                                                                                                                                            |
|---------------|------|-----------|---------|---------|-------------------------------------------------------------------------------------------------------------------------------------|----------------------------------------------------------------------------------------------------------------------------------------------------------------------------------------------------------------------------------------------------------------------------|
|               |      |           |         |         |                                                                                                                                     | recurrence, second primary BC and lower CSS than five years or more. $\geq 80$ years of age and comorbid conditions reduce likelihood of yearly mammograms. Each additional surveillance mammogram was associated with a reduction in the odds of breast cancer mortality. |
| Smidt         | 2005 | 229       |         |         | Validation of nomogram                                                                                                              | The nomogram provides a fairly accurate prediction of the probability of non-SLN metastases.                                                                                                                                                                               |
| van de Water  | 2012 | 9766      | All age | 5.1 yrs | Association between age at diagnosis and breast cancer outcome in postmenopausal women with hormone receptor-positive breast cancer | Higher risk of disease-specific mortality with increasing age (reference standard, patients $<65$ years [hazard ratio {HR} for patients aged 65-74 years, 1.12; 95% CI, 0.94-1.34; hr for patients aged $\geq 75$ years, 1.66; 95% CI, 1.34-2.06; $p < .001$ ]).           |
| van den Hoven | 2010 | 168       |         |         | Validation of nomogram                                                                                                              | Performance of the MSKCC nomogram was insufficient.                                                                                                                                                                                                                        |
| Van Zee       | 2003 | 702 + 373 |         |         | Validation of nomogram                                                                                                              | Pathological size, tumor type and nuclear grade, lymphovascular invasion, multifocality, and estrogen-                                                                                                                                                                     |



|        |      |       |          |                                                                                                                 |                                                                                                                                                                                                                                                                                                                                                                                                  |
|--------|------|-------|----------|-----------------------------------------------------------------------------------------------------------------|--------------------------------------------------------------------------------------------------------------------------------------------------------------------------------------------------------------------------------------------------------------------------------------------------------------------------------------------------------------------------------------------------|
|        |      |       |          |                                                                                                                 | receptor status of the primary tumor; method of detection of SLN metastases; number of positive SLNs; and number of negative SLNs are criteria useful to develop a nomogram to easily and accurately calculate the likelihood of having additional, non-SLN metastases for an individual patient.                                                                                                |
| Wagner | 2011 | 818   |          | Effect of time to surgery on tumor growth by comparing initial imaging and pathologic tumor size                | Modest time intervals (mean 21 days, range 1-132) from imaging to surgery are not significantly associated with change in tumor size.                                                                                                                                                                                                                                                            |
| Wang   | 2010 | 31298 | All ages | Pattern of breast cancer surgery after adjusting for other major prognostic factors in relation to patient age. | After adjusting for histologic grade, number of cancers, tumor size, tumor location, the EIC presence (yes or no), and LN status (+ or -), compared with the group aged 51–70 years (the reference group), the group aged >70 years had only half the chance of receiving BCS (OR=0.498, 95% ci: 0.455–0.545).there was no difference between women aged 51–70 years and those aged >70 years in |

|             |      |      |       |                                                                                                                                      |                                                                                                                                                                                                                                                    |
|-------------|------|------|-------|--------------------------------------------------------------------------------------------------------------------------------------|----------------------------------------------------------------------------------------------------------------------------------------------------------------------------------------------------------------------------------------------------|
|             |      |      |       |                                                                                                                                      | tumor histologic grade, prevalence of LN+, and LVI although higher t in women aged >70 years.                                                                                                                                                      |
| Williams    | 2008 | 4222 | ≥65   | Relationship between wealth and screening mammography use in older women according to life expectancy                                | Financial resources determine access to screening mammography more than the possible benefit. Poorer older women with favorable prognoses are at risk of not receiving screening mammography when they are likely to benefit.                      |
| Wyld et al, | 2004 | 378  | 55-98 | Investigate reasons for failure in improving outcome in older women                                                                  | Stage at presentation of breast cancer is more advanced in older women and that this difference may be largely due to lack of mammographic screening. Thus, their treatment more frequently falls outside of agreed national and local guidelines. |
| Yood        | 2008 | 1837 | ≥65   | To compare the effect of primary breast cancer therapy (breast-conserving surgery [BCS] without radiation therapy [RT], BCS plus RT, | After adjusting for age, race and ethnicity, baseline Charlson Comorbidity Index category, tumor size, number of positive lymph nodes, receptor status, and histologic grade, women receiving BCS without RT were more likely                      |

|  |  |  |  |  |                                                                                                                        |                                                                                                                                                                                                                                                                                                                                                                                                                                                                                                                                       |
|--|--|--|--|--|------------------------------------------------------------------------------------------------------------------------|---------------------------------------------------------------------------------------------------------------------------------------------------------------------------------------------------------------------------------------------------------------------------------------------------------------------------------------------------------------------------------------------------------------------------------------------------------------------------------------------------------------------------------------|
|  |  |  |  |  | <p>and mastectomy) on mortality, and the additional effect of tamoxifen among those with hormone-responsive tumors</p> | <p>to die of breast cancer (HR=2.19, 95% CI, 1.51 to 3.18) than women receiving mastectomy (adjusted rate difference = 50%). Women receiving BCS+RT had a rate of breast cancer death similar to that of patients receiving mastectomy (HR=1.08, 95% CI, 0.79 to 1.48; adjusted rate difference=0.4%). Tamoxifen for less than 1 year was associated with a higher rate of death compared with 5 years or more, (HR=6.26, 95% CI, 3.10 to 12.64). The survival benefit from tamoxifen increased with increasing therapy duration.</p> |
|--|--|--|--|--|------------------------------------------------------------------------------------------------------------------------|---------------------------------------------------------------------------------------------------------------------------------------------------------------------------------------------------------------------------------------------------------------------------------------------------------------------------------------------------------------------------------------------------------------------------------------------------------------------------------------------------------------------------------------|
