# Supplementary material for: Prognostic factors in elderly patients with breast cancer
Source: PubMed Central journal article supplement (PMC3851261; doi:10.1186/1471-2482-13-s2-s2), 2013-10-08
Supplement: 1471-2482-13-S2-S2-S2.pdf [file 1471-2482-13-S2-S2-S2.pdf]

Additional file 2. Other studies consulted and cited even not fulfilling criteria.

| Critical points                                     | Authors        | Year | Aim of the study                                           |
|-----------------------------------------------------|----------------|------|------------------------------------------------------------|
| consensus conference, guidelines and recommendation | Fitzgibbons    | 2000 | consensus conference                                       |
|                                                     | Lyman          | 2005 | guidelines                                                 |
|                                                     | Kimmick & Muss | 2001 | recommendation                                             |
|                                                     | Audisio        | 2004 | recommendation                                             |
|                                                     | Biganzoli      | 2012 | recommendation                                             |
| no survival informations                            | Durbecq        | 2008 | influence of age on the incidence of BC molecular subtypes |
| incidental or no age criteria                       | Alran          | 2007 | validation study,                                          |
|                                                     | Klar           | 2008 | validation of nomogram                                     |
|                                                     | Kohrt          | 2008 | validation of nomogram                                     |
|                                                     | Pal            | 2008 | validation of nomograms                                    |
|                                                     | Gur            | 2010 | validation study of nomogram                               |
|                                                     | Melicharovà    | 2010 | test urinary neopterin as marker of comorbidity            |
|                                                     | van den        | 2010 | validation of nomogram                                     |

|             |      |                                                                                                         |
|-------------|------|---------------------------------------------------------------------------------------------------------|
| Hoven       |      |                                                                                                         |
| Wagner      | 2011 | effect of time to surgery on tumor growth by comparing initial imaging and pathologic tumor size        |
| Mittendorf  | 2012 | incorporation of metastasis size in SN in a nomogram                                                    |
| Sasada      | 2012 | validation of nomogram                                                                                  |
| Charlson    | 1994 | impact of comorbidity and description of score system                                                   |
| Carter      | 1989 | impact of T and N on survival                                                                           |
| Van Zee     | 2003 | validation of nomogram                                                                                  |
| Somner      | 2004 | establish recommendations for the number of lymph nodes to be recovered from each AND specimen          |
| Barranger   | 2005 | validation study                                                                                        |
| Ramirez     | 1999 | Prediction of delayed diagnosis                                                                         |
| Smidt       | 2005 | validation of nomogram                                                                                  |
| Poltinnikov | 2006 | cause specific survival (CSS), (OS), and combined nodal and distant failure (NDF). Her-2 neu positivity |
| Ponzone     | 2007 | validation of nomogram                                                                                  |
| Coutant     | 2008 | validation study of nomogram                                                                            |
| Di Vita     | 2010 | Prognostic factors                                                                                      |
| Ahn         | 2011 | Lymph node ratio and pN staging                                                                         |
| Hidar       | 2011 | validation study of nomogram                                                                            |
| Andersson   | 2012 | validation study                                                                                        |
| Cappellani  | 2012 | review                                                                                                  |
| Paik        | 2004 | Validation study (multigene essay)                                                                      |
| Albrand &   | 2008 | review                                                                                                  |

|                                                |               |      |                                                                                                                                                |
|------------------------------------------------|---------------|------|------------------------------------------------------------------------------------------------------------------------------------------------|
|                                                | Terret        |      |                                                                                                                                                |
|                                                | Leonard       | 2011 | efficacy of CHT in elderly                                                                                                                     |
|                                                |               |      |                                                                                                                                                |
| no survival information nor predictive factors | Repetto       | 2002 | utility of geriatric assessment                                                                                                                |
|                                                | Lavelle et al | 2007 | rating non standard treatment in elderly                                                                                                       |
|                                                | Chatzidaki    | 2011 | Histologic characteristic                                                                                                                      |
|                                                |               |      |                                                                                                                                                |
| not in English                                 | Solej         | 2007 | Validation study (surgery)                                                                                                                     |
|                                                |               |      |                                                                                                                                                |
| small sample,                                  | Yildirim      | 2008 | To test the effect of the immune response on the outcome of patients with cancer                                                               |
|                                                | Orsoni        | 2011 | validation of nomogram                                                                                                                         |
|                                                | Osborn        | 2011 | efficacy of primary HT                                                                                                                         |
|                                                |               |      |                                                                                                                                                |
| small sample, incidental age criteria          | D'Eredità     | 2010 | validation study of nomogram                                                                                                                   |
|                                                | Lowery        | 2011 | compare prognostic biomarkers between interval and screen-detected breast cancers overall, and according to age at diagnosis and familial risk |
|                                                | Unal          | 2009 | validation of nomogram in patients receiving neoadjuvant CHT (NCT)                                                                             |

|                              |                     |      |          |
|------------------------------|---------------------|------|----------|
|                              |                     |      |          |
| study on<br>metastatic cases | Janssen-<br>Heijnen | 2007 | survival |
|                              | Jung                | 2012 | survival |
|                              |                     |      |          |
